# Supplementary material for: Oncological Features of Intravenous Leiomyomatosis: Involvement of Mesenchymal Tumor Stem-Like Cells
Source: Preprints.org preprint supplement (doi:10.20944/preprints202109.0158.v1), 2021-09-08
Supplement: Supplementary file 1 [file supplementary]

Archive with 7 entries (7 files):
- suplementary materials/Enago-Certificate-TABUWJ-35..pdf
- suplementary materials/Figure 1..tif
- suplementary materials/Figure 2.tif
- suplementary materials/Figure 3.tif
- suplementary materials/Figure 4.tif
- suplementary materials/Figure 5.tif
- suplementary materials/Supplementary materials.merged.09.04.2021.pdf
