# Supplementary figures and images for: Oncological Features of Intravenous Leiomyomatosis: Involvement of Mesenchymal Tumor Stem-Like Cells
Source: Preprints.org preprint supplement (doi:10.20944/preprints202109.0158.v1), 2021-09-08

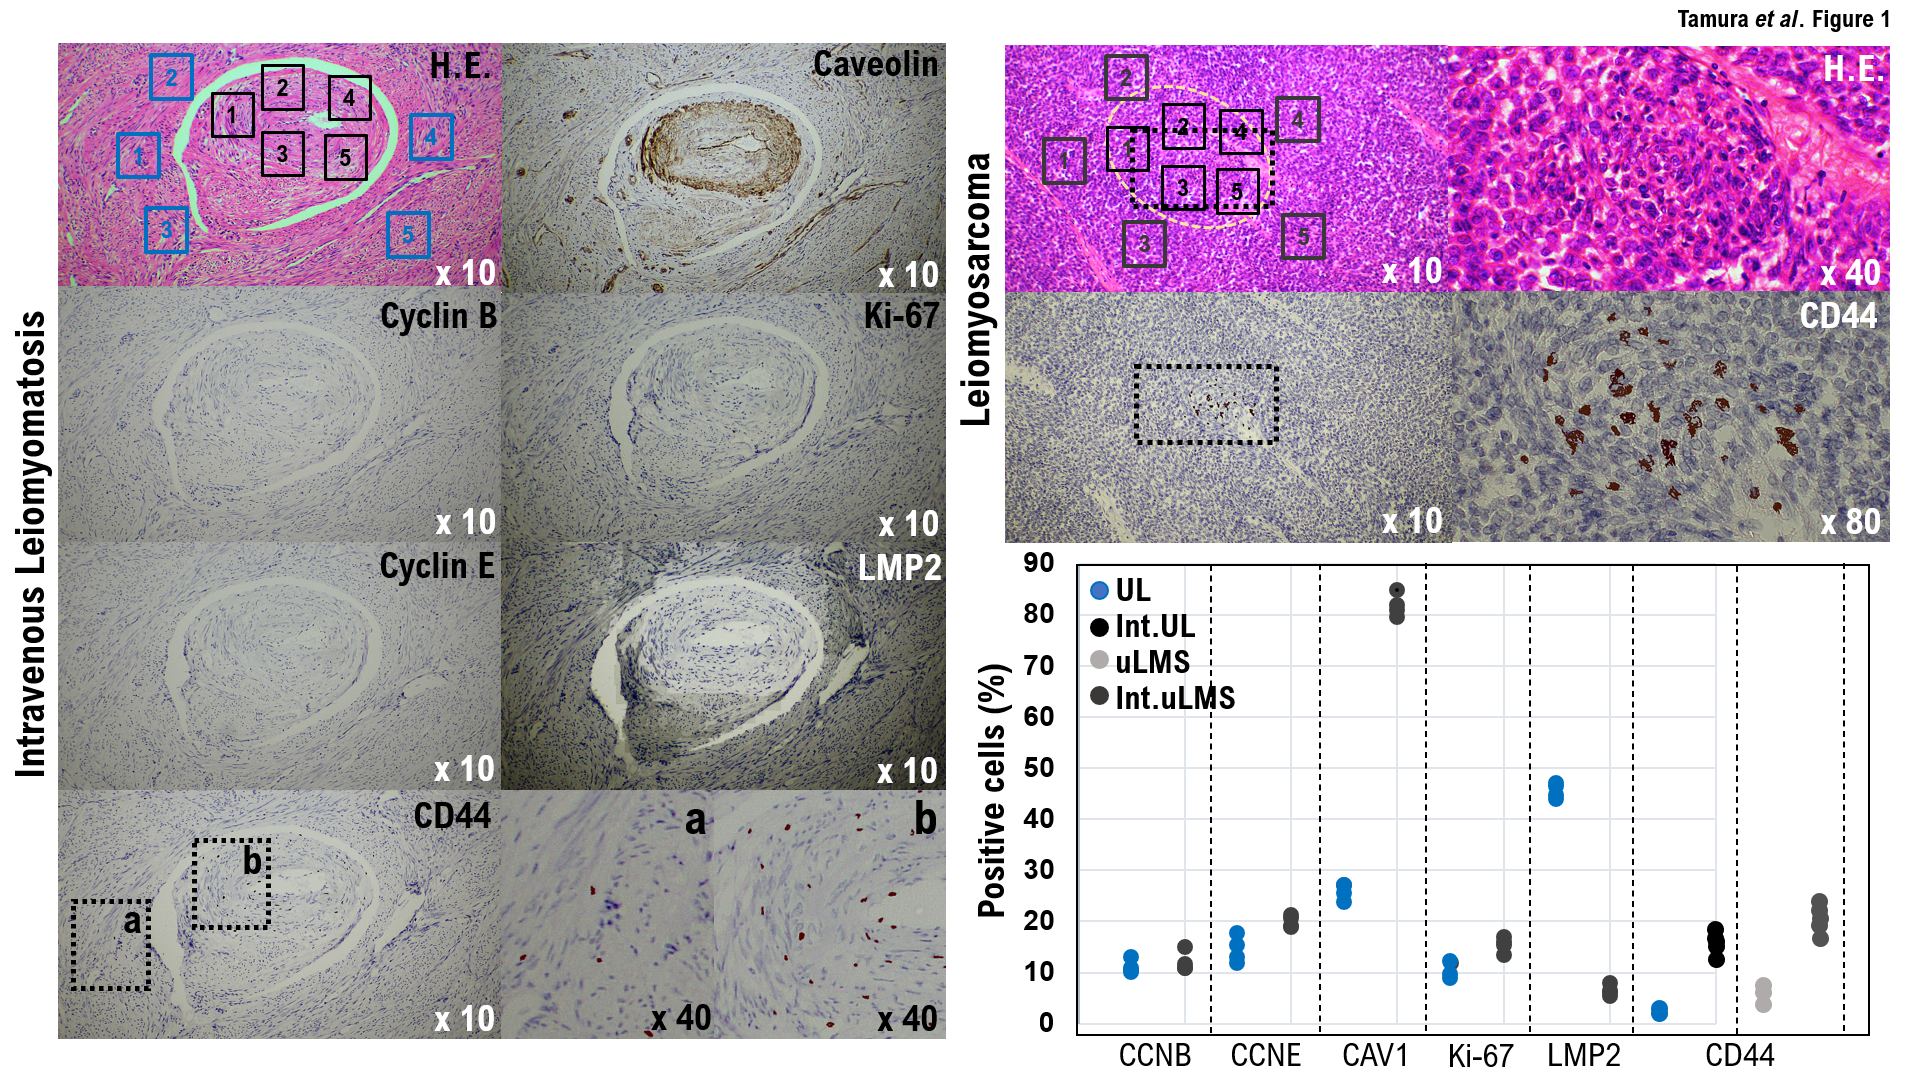

Supplement: Supplementary file 1 [file supplementary › suplementary materials/Figure 1..tif]

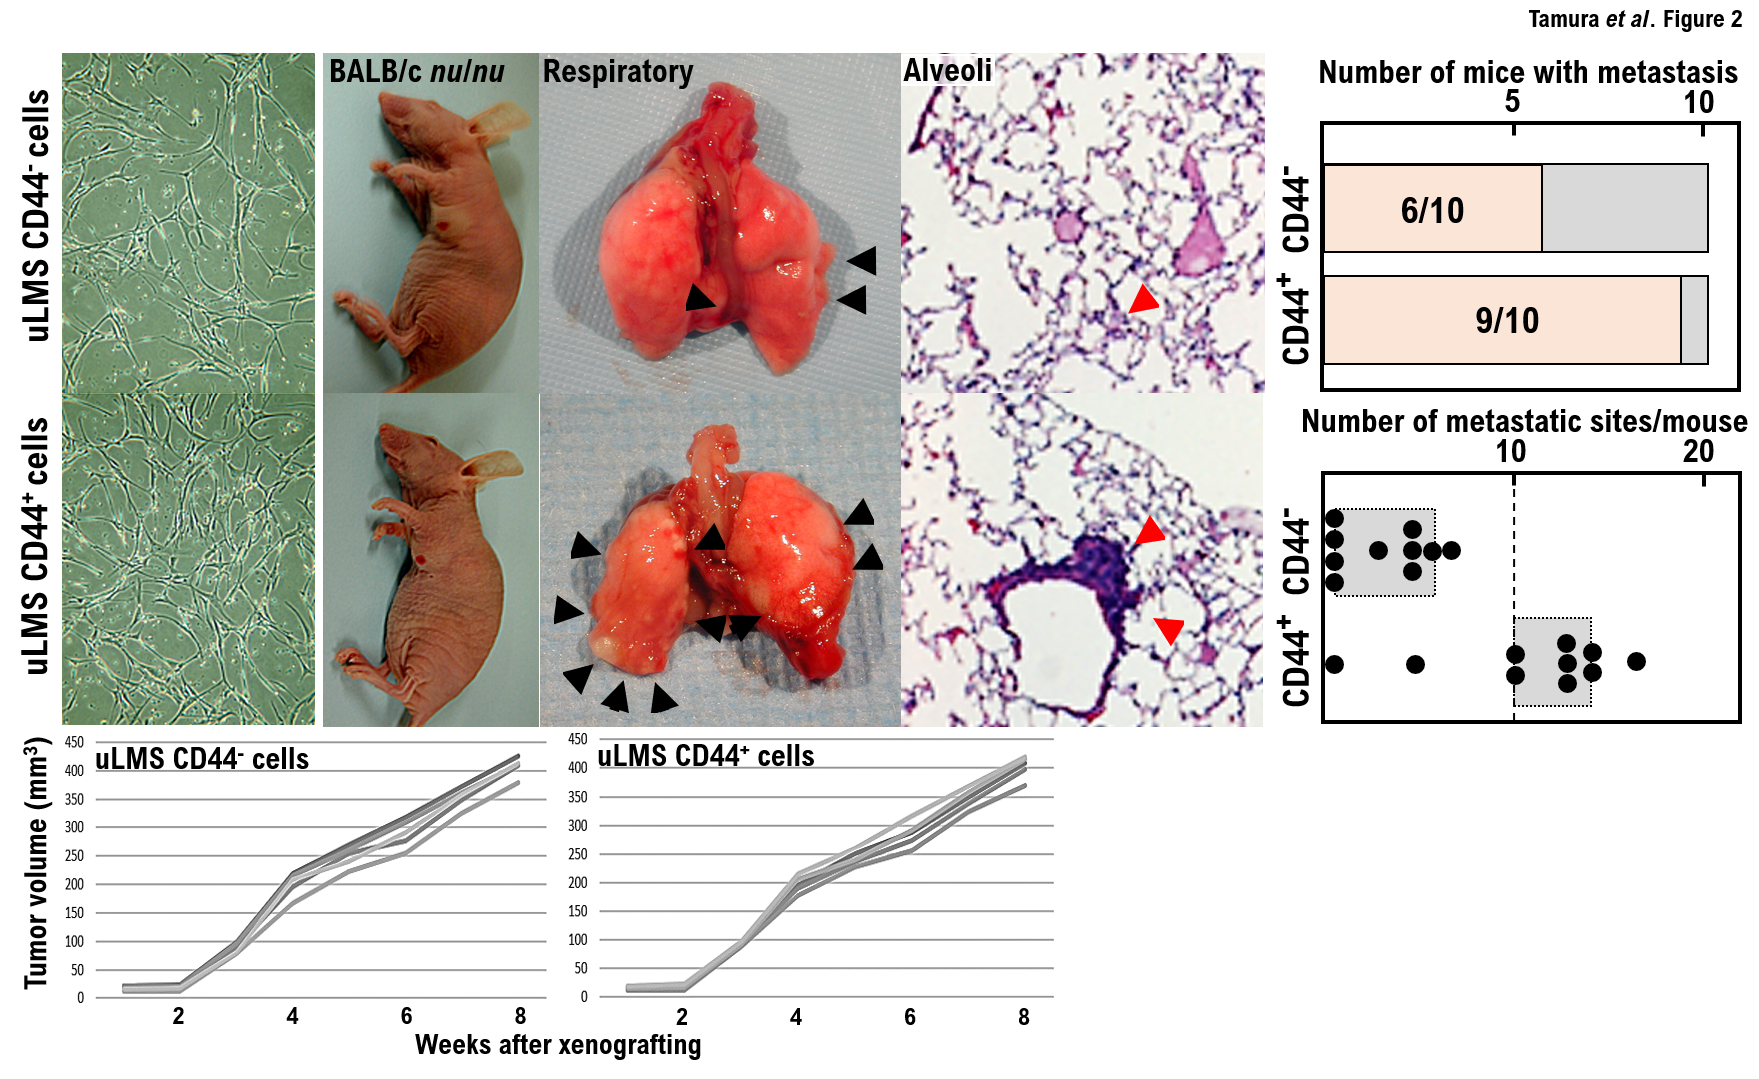

Supplement: Supplementary file 1 [file supplementary › suplementary materials/Figure 2.tif]

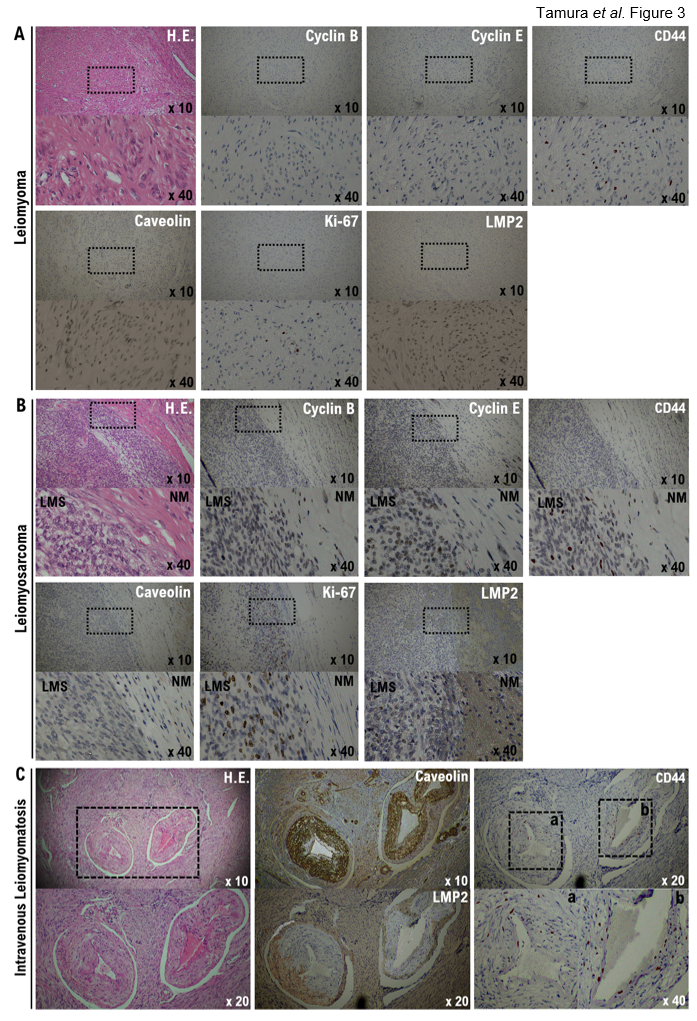

Supplement: Supplementary file 1 [file supplementary › suplementary materials/Figure 3.tif]

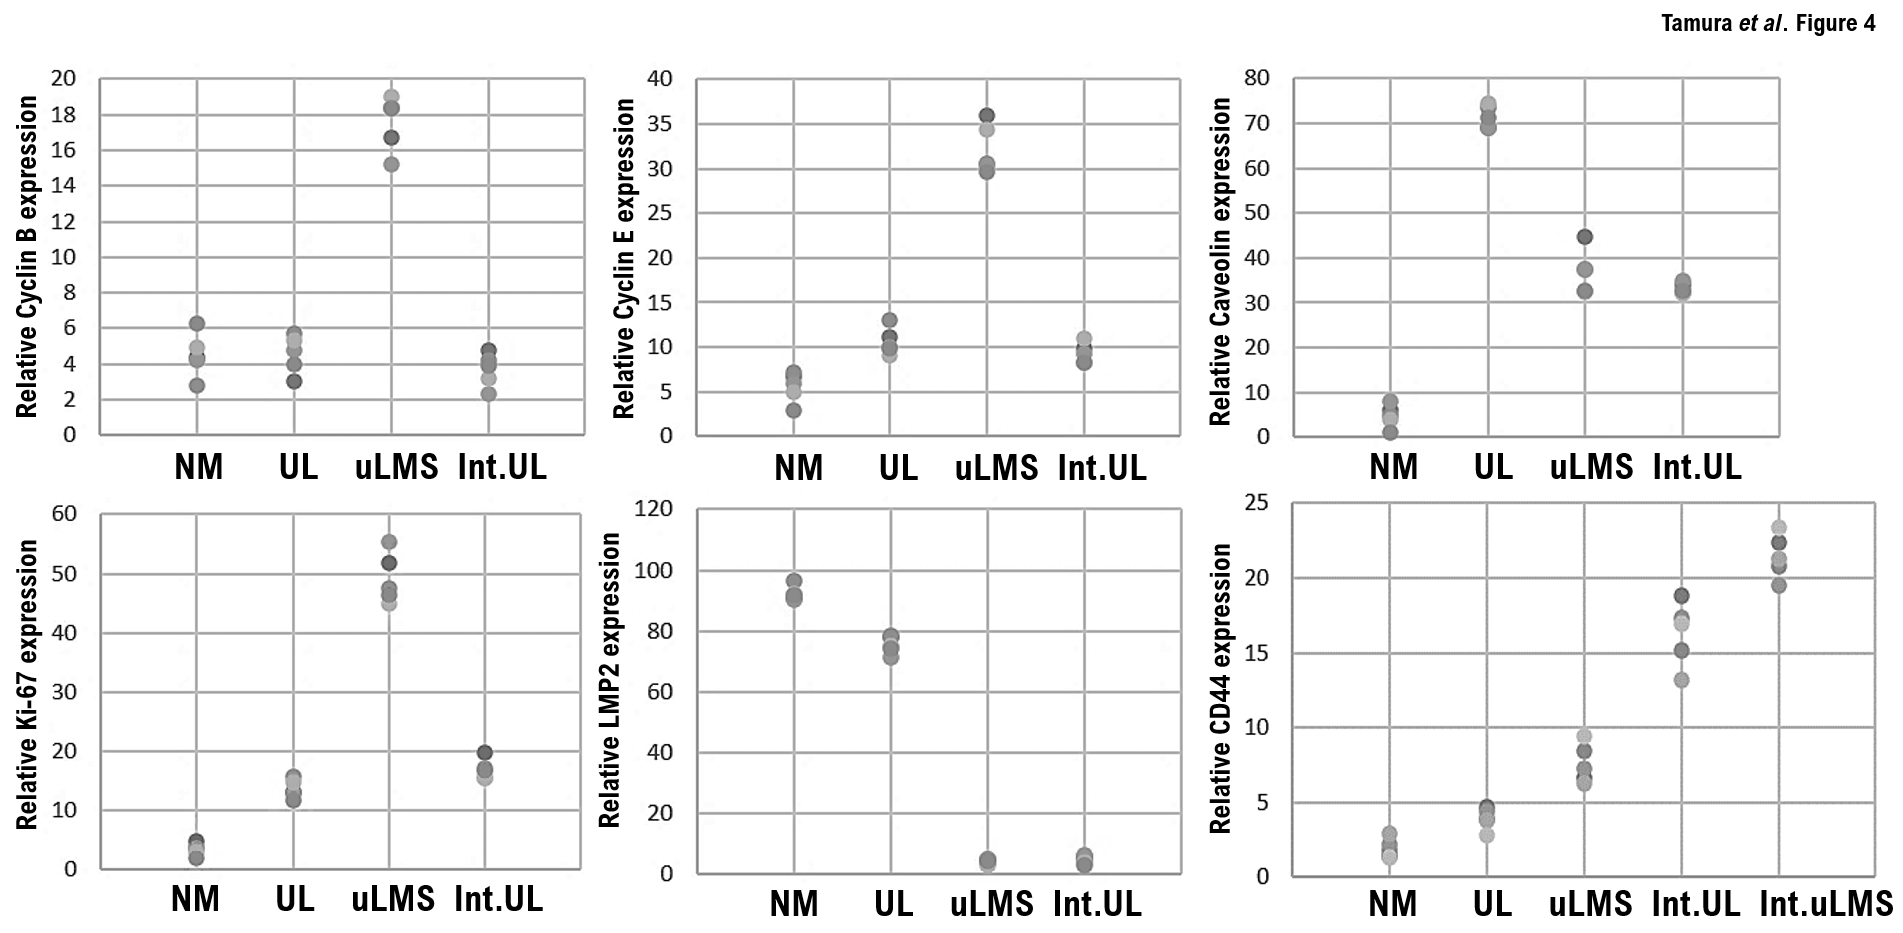

Supplement: Supplementary file 1 [file supplementary › suplementary materials/Figure 4.tif]

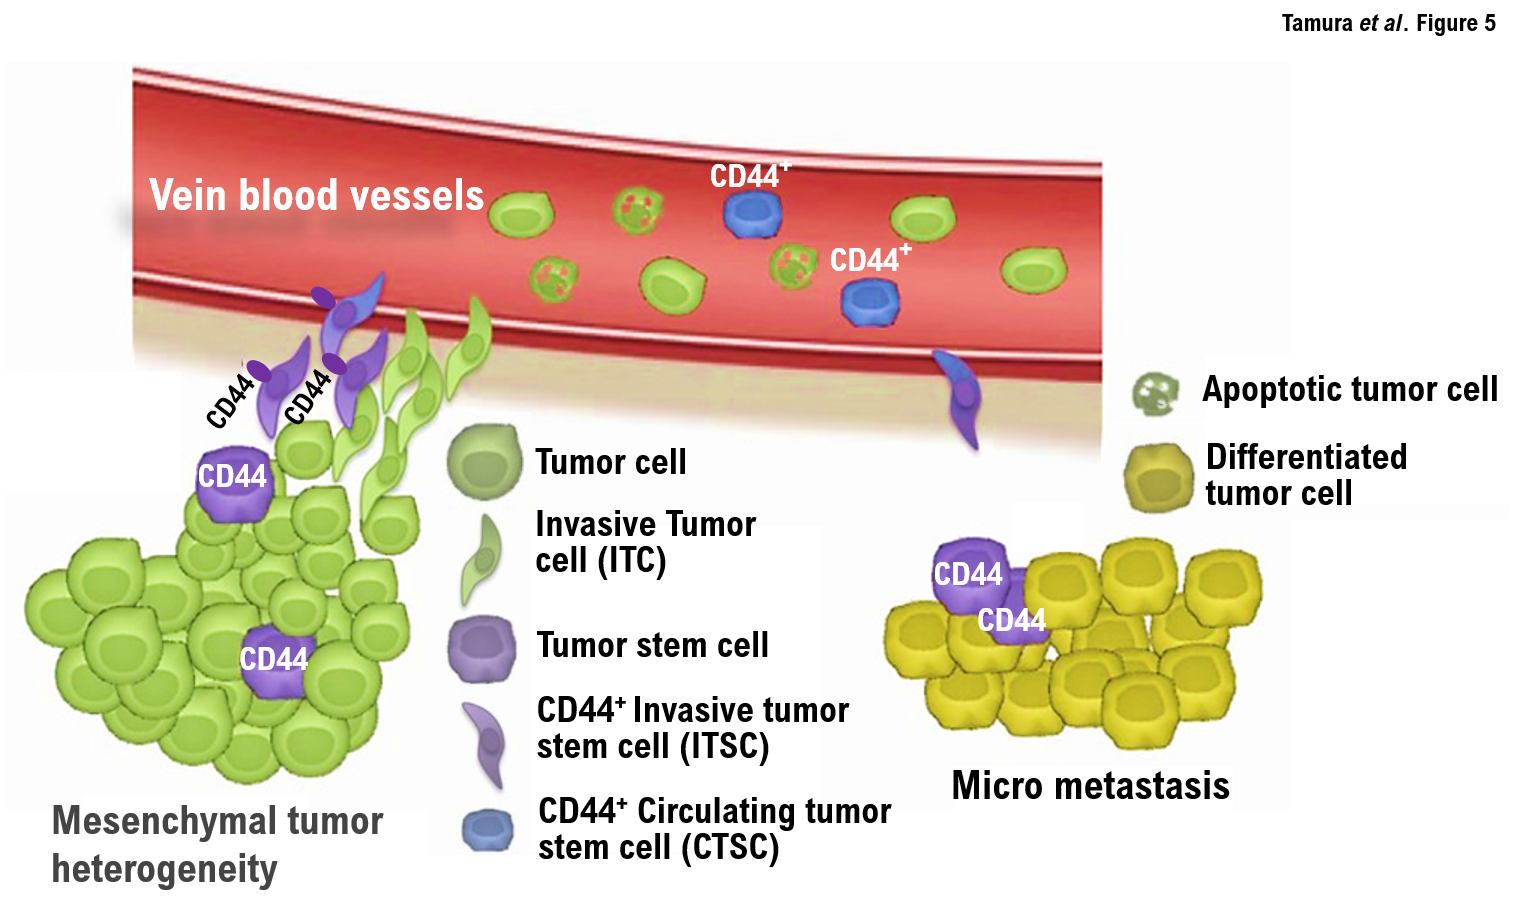

Supplement: Supplementary file 1 [file supplementary › suplementary materials/Figure 5.tif]
